# Supplementary material for: The course of African swine fever in Romanian backyard holdings – A case report
Source: PubMed Central journal article supplement (PMC8604127; doi:10.1002/vms3.592), 2021-08-11

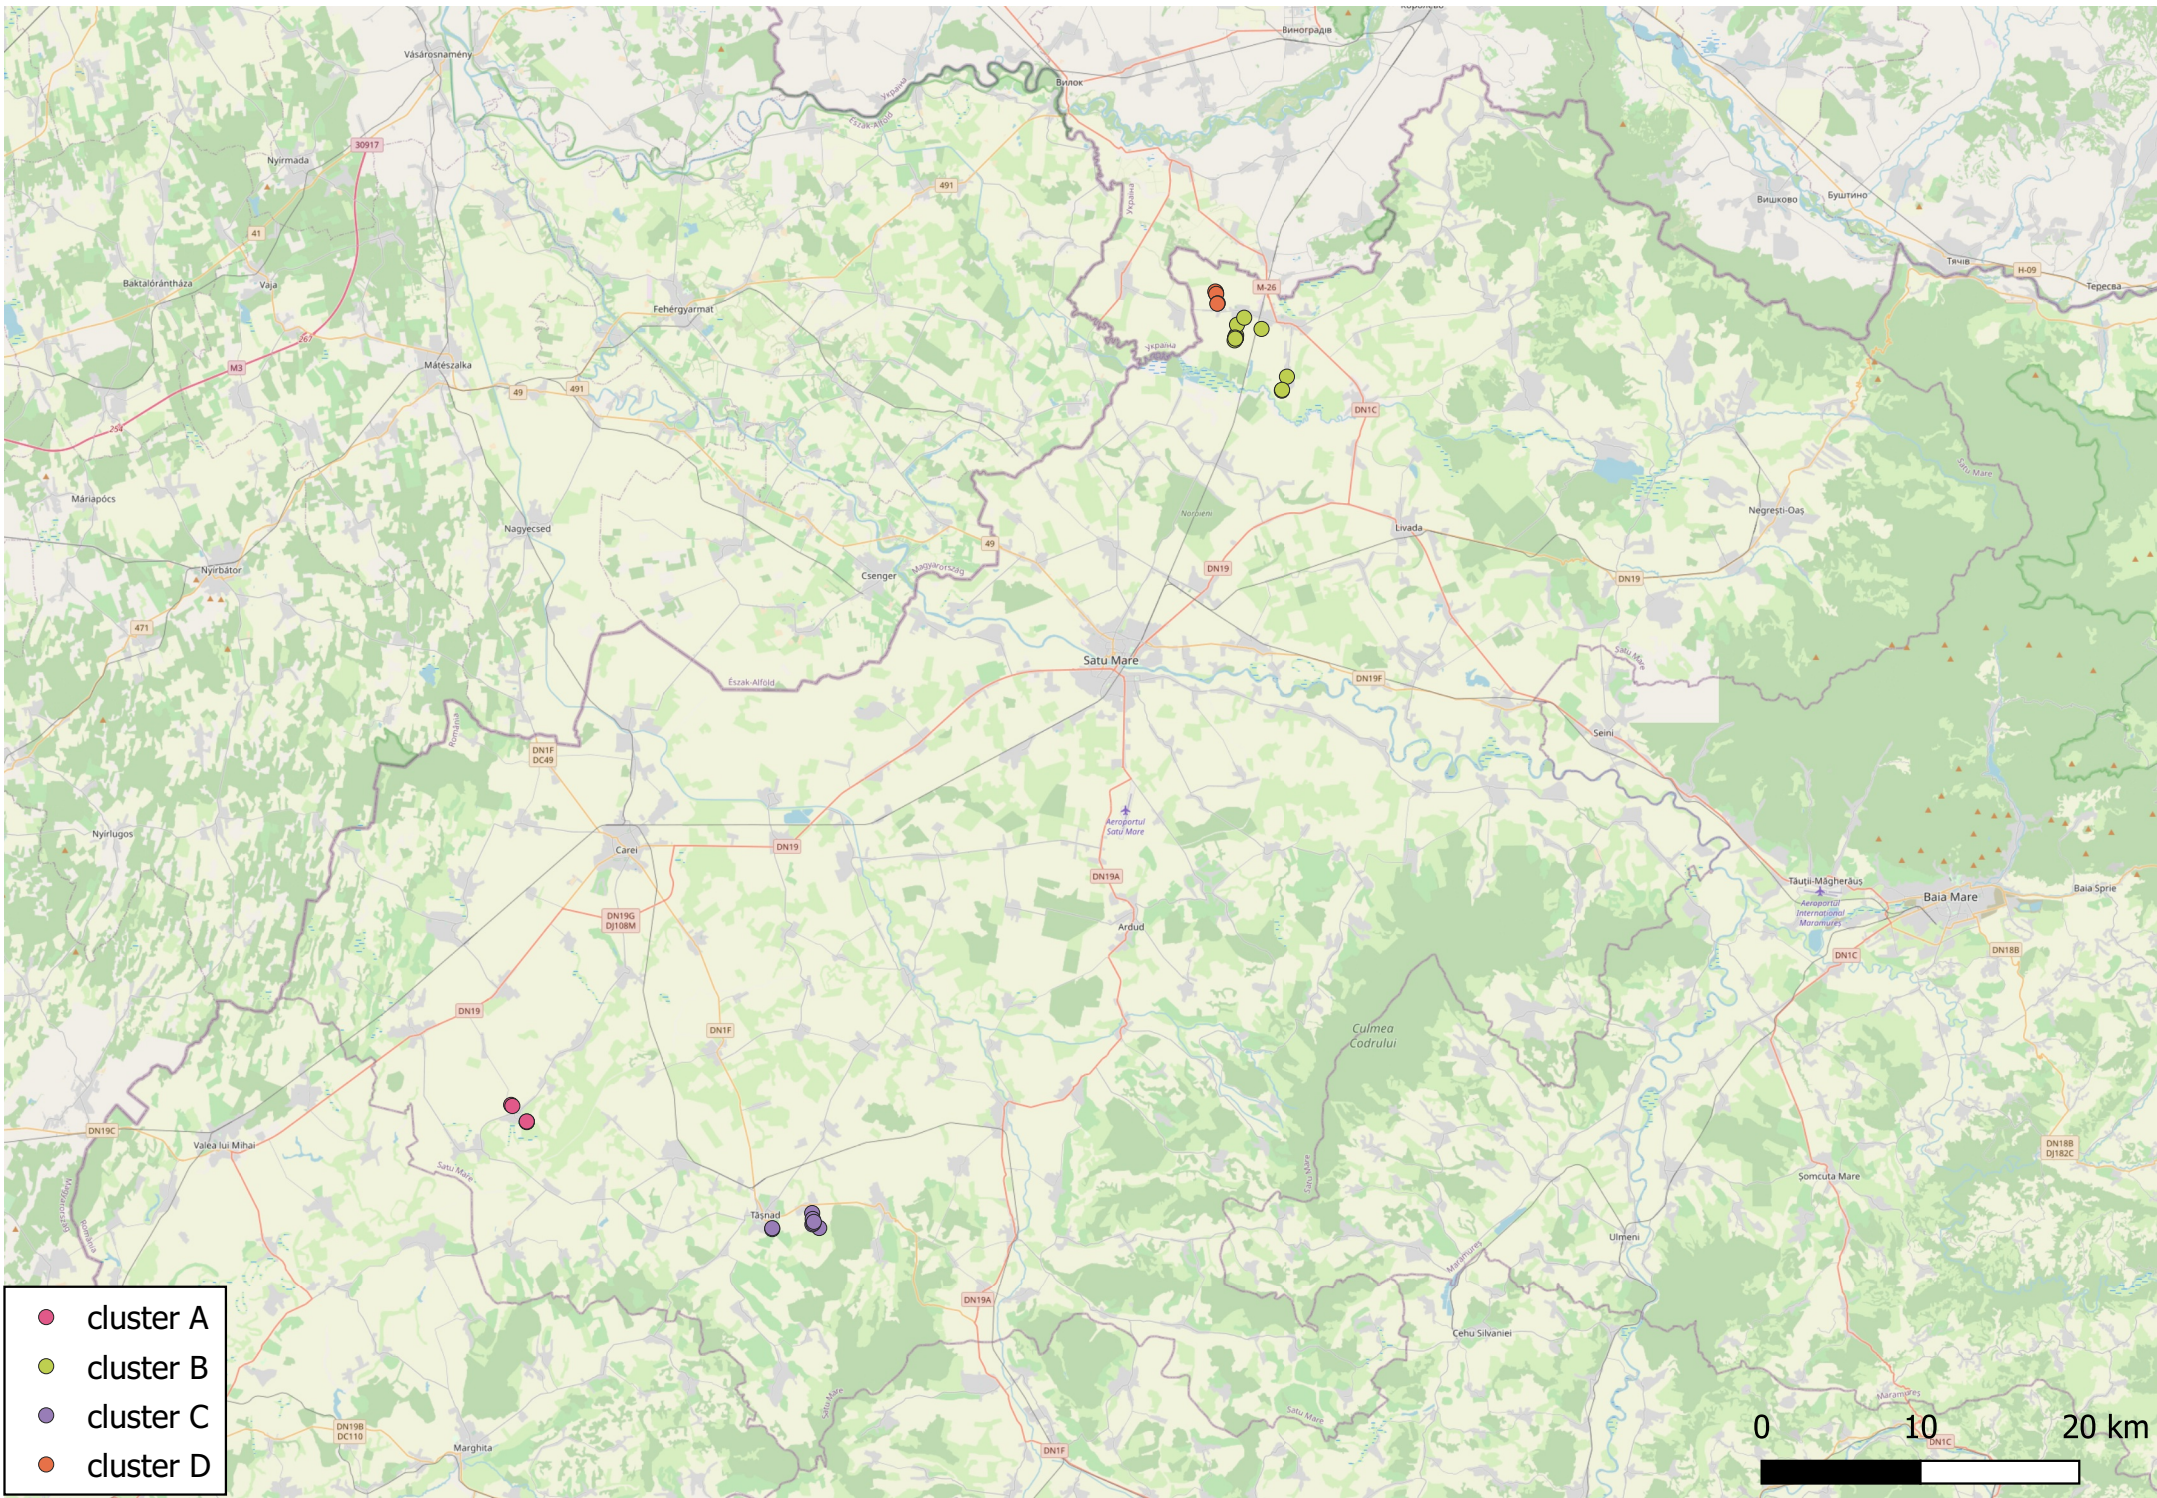

- cluster A
- cluster B
- cluster C
- cluster D

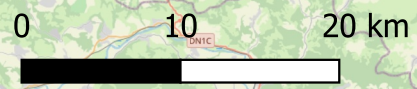

Supplement: VMS3-7-2273-s002.pdf [file VMS3-7-2273-s002.pdf]
